# Supplementary material for: Light activated synthesis of the atomically precise fluorescent silver cluster Ag18(Capt)14
Source: Royal Society of Chemistry journal article supplement (doi:10.1039/c9nr07626c), 2019-01-01
Supplement: c9nr07626c1.pdf [file c9nr07626c1.pdf]

## Supporting information:

# Light Activated Synthesis of the Atomically Precise Fluorescent Silver Cluster $\text{Ag}_{18}(\text{Capt})_{14}$

Hannah S. Ramsay, Max M. Silverman, David Simon, Richard D. Oleschuk and Kevin G. Stampelcoskie\*

Department of Chemistry, Queen's University, 90 Bader Lane, Kingston, Ontario K7L 3M6

### 1. Instrumentation

Absorbance spectra of nanoclusters were recorded using an Agilent Cary 60 UV-Vis absorbance spectrometer. Fluorescence excitation-emission matrix (EEM) spectra and emission-excitation scans were taken using the Horiba Duetta Fluorescence and Absorbance Spectrometer, and Rayleigh scattering was corrected using EzSpec<sup>TM</sup> software. Electrospray ionization mass spectrometry was performed using a Thermo Scientific LTQ Orbitrap Velos hybrid FT mass spectrometer, connected via a liquid junction to a syringe pump. The pump delivered the electrospray solution at a given flow rate through a transferring capillary (360  $\mu\text{m}$  outer diameter and 75  $\mu\text{m}$  inner diameter). The voltage was set to 3.0 kV with a capillary temperature of 275°C, a sweep gas rate of 6 arb and a sheath flow gas rate of 15 arb. All experiments were performed in positive ion mode. SDS PAGE was performed using the Bio Rad Mini-PROTEAN Tetra Vertical Electrophoresis Cell. 1.5 mm gels were synthesized that contained a 6% pH 6.8 stacking gel and a 29% pH 8.8 separation gel, which were then loaded with aqueous sample and run at 120 V for 15 minutes and then increased to 300 V for 1 hour.

### 2. Supporting Figures

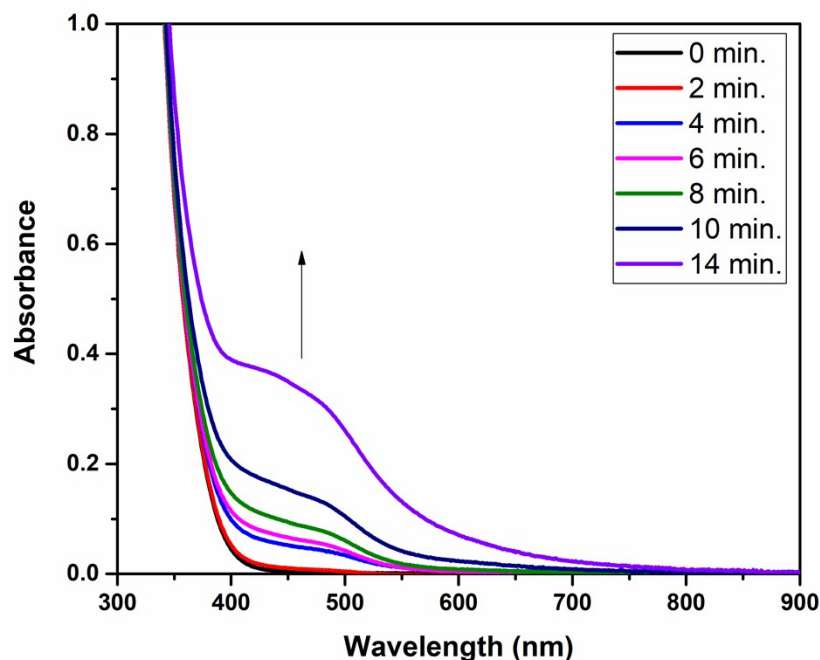

**Figure S1.** Absorbance spectra of formation of  $\text{Ag}_{18}(\text{Capt})_{14}$  over 8 minutes, with new absorbance features indicating the formation of new products being formed after 8 minutes.

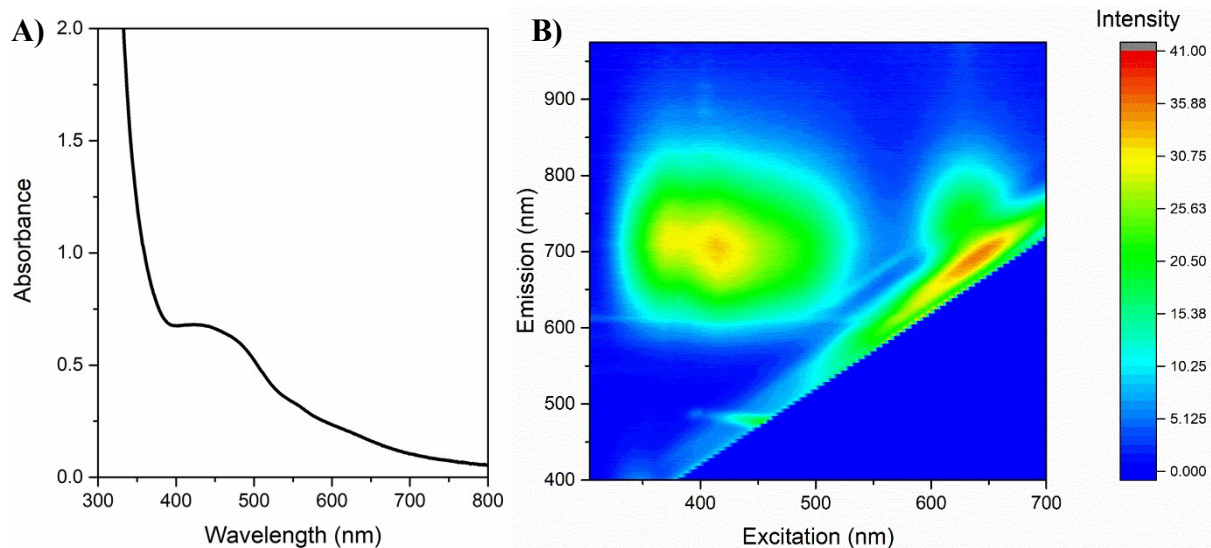

**Figure S2.** A) Absorbance spectroscopy and B) fluorescence EEM spectroscopy of product that forms when reaction solution is left irradiating under UVA exposure panel for 20 minutes.

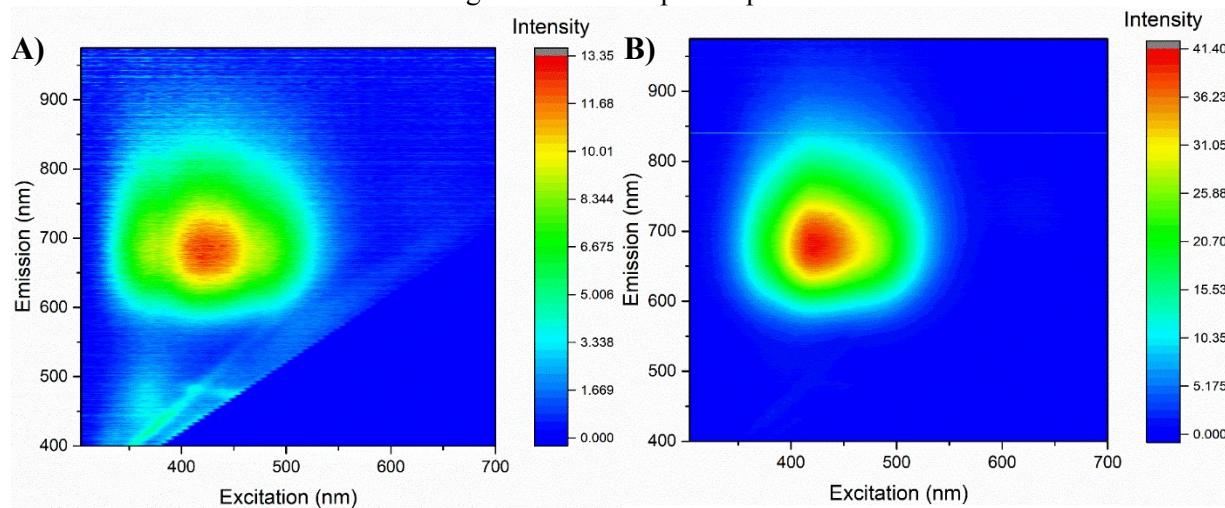

**Figure S3.** Fluorescence EEM spectroscopy scans of product (A) directly after synthesis and (B) after washing with ultrapure water in centrifugal filters with a 3 kDa cutoff 10 times.

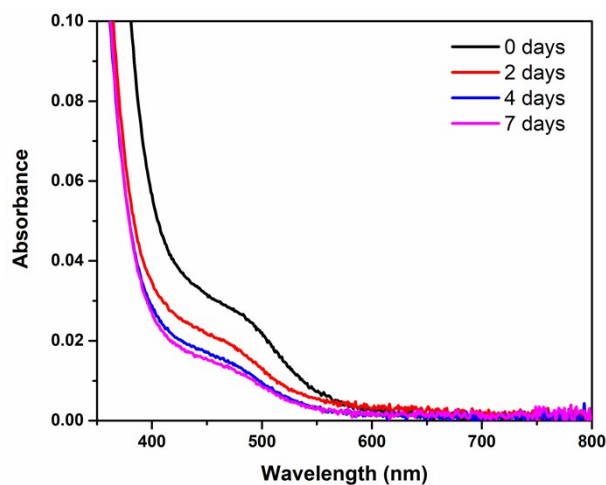

**Figure S4.** Absorbance decay of  $\text{Ag}_{18}(\text{Capt})_{14}$  over the course of 7 days when stored at  $37^\circ\text{C}$ .

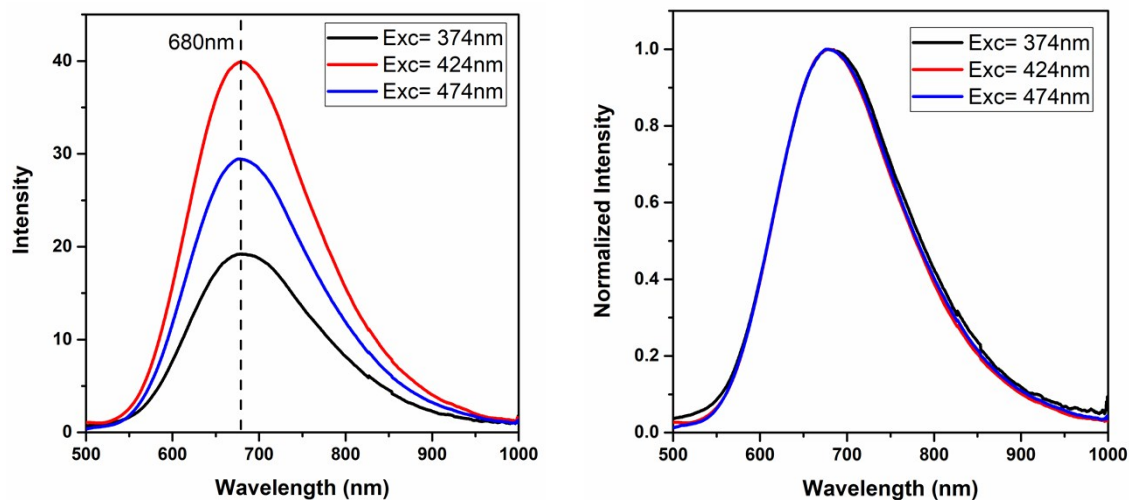

**Figure S5.** Emission spectra of  $\text{Ag}_{18}(\text{Capt})_{14}$  recorded at wavelengths of 374 nm, 424 nm and 474 nm (left) and normalized (right).

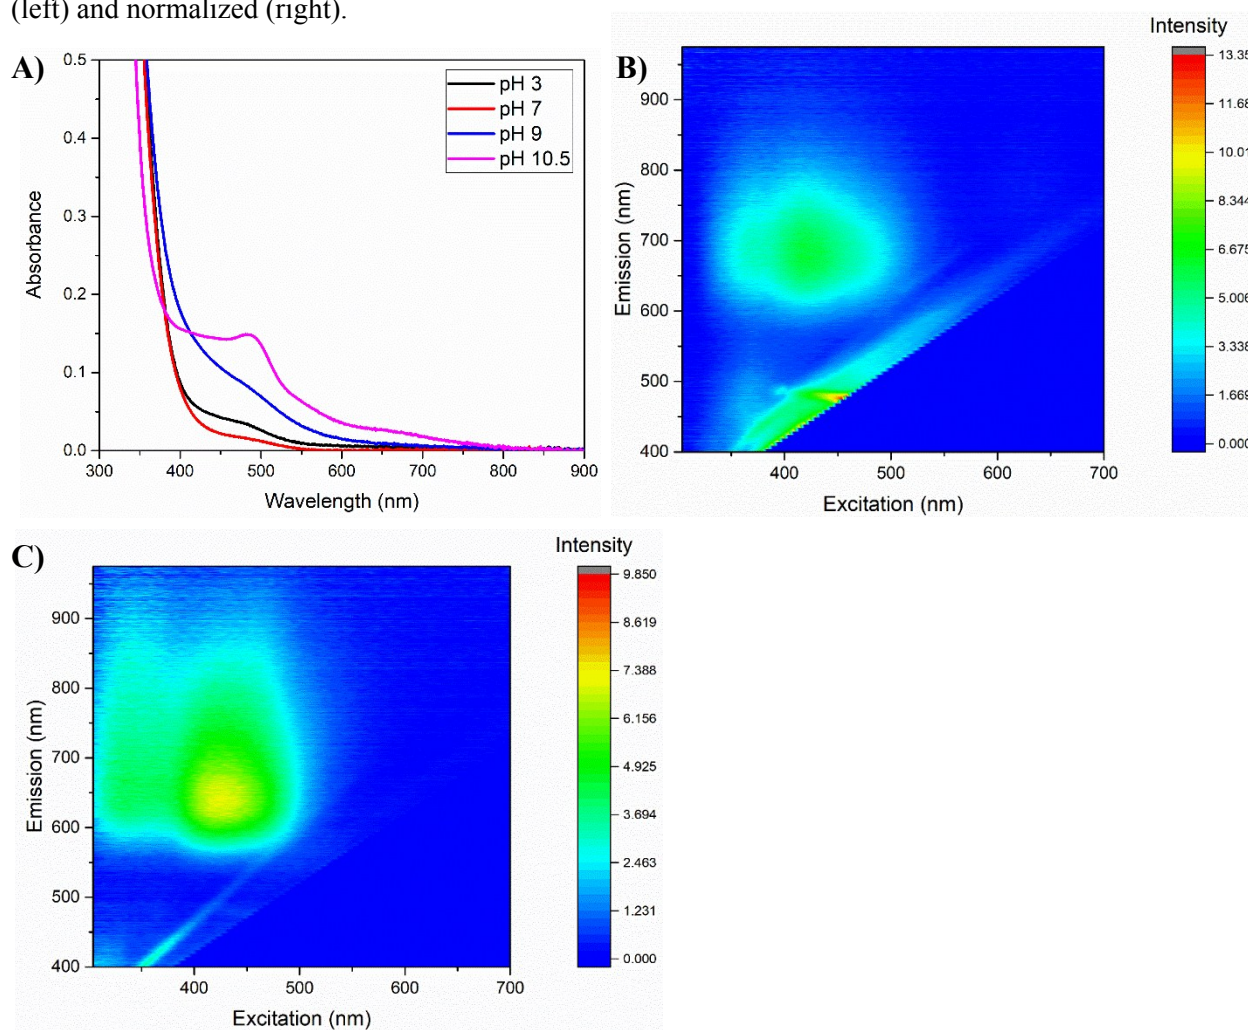

**Figure S6.** A) Absorbance spectra of clusters formed when captopril stock solution brought to a pH of 3, 7, 9 or 10.5, and fluorescence EEM of B) pH 9 product and C) pH 10.5 product.

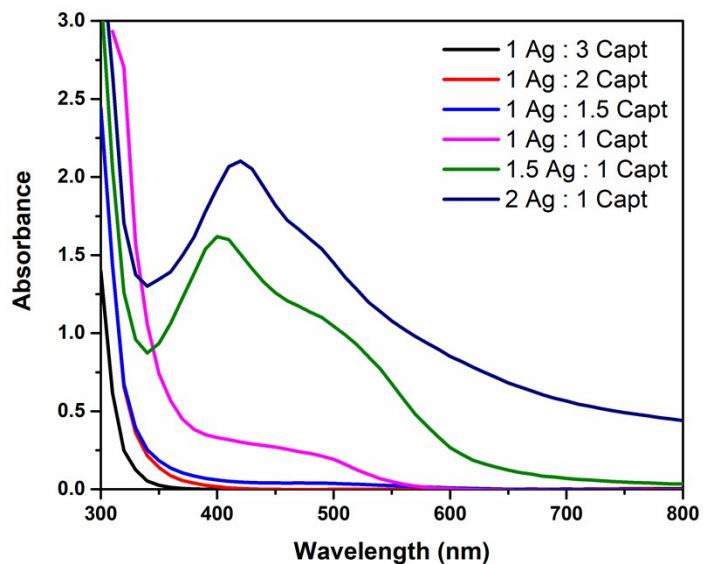

**Figure S7.** Absorbance of products formed using different relative concentrations of silver nitrate and captopril.

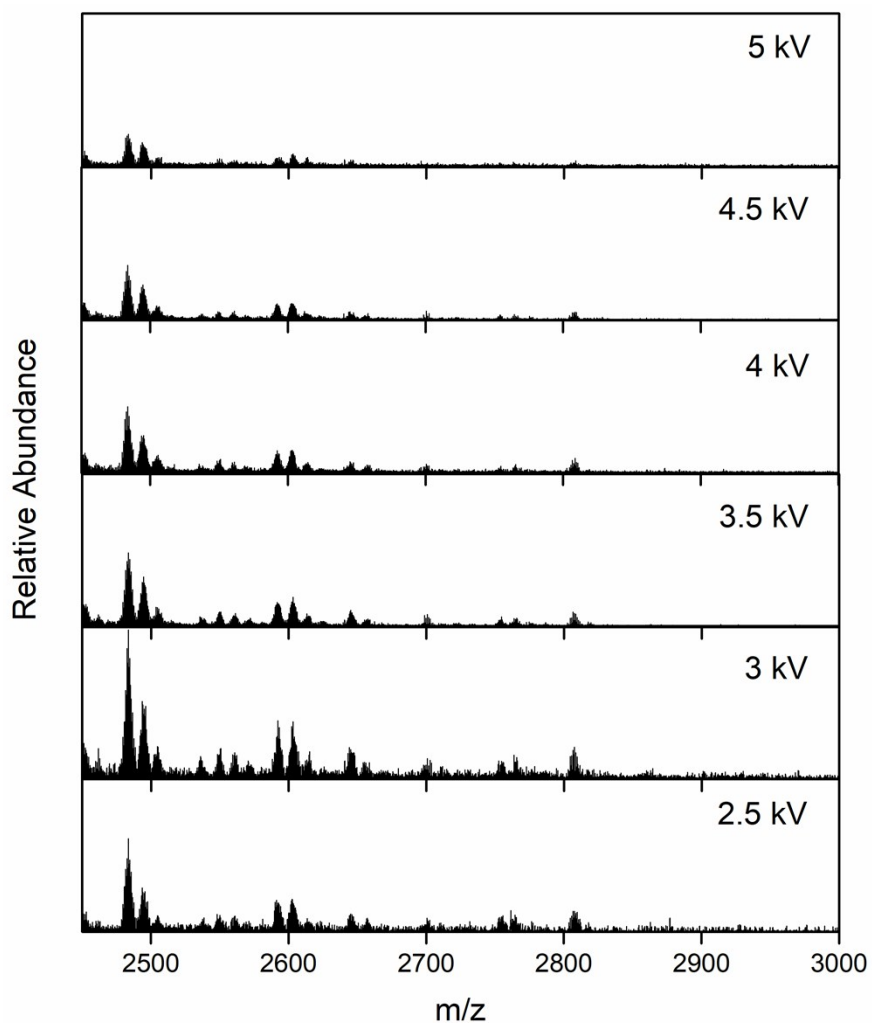

**Figure S8.** ESI-MS of silver clusters (AgNCs) performed using a spray voltage of 2.5 to 5 kV.

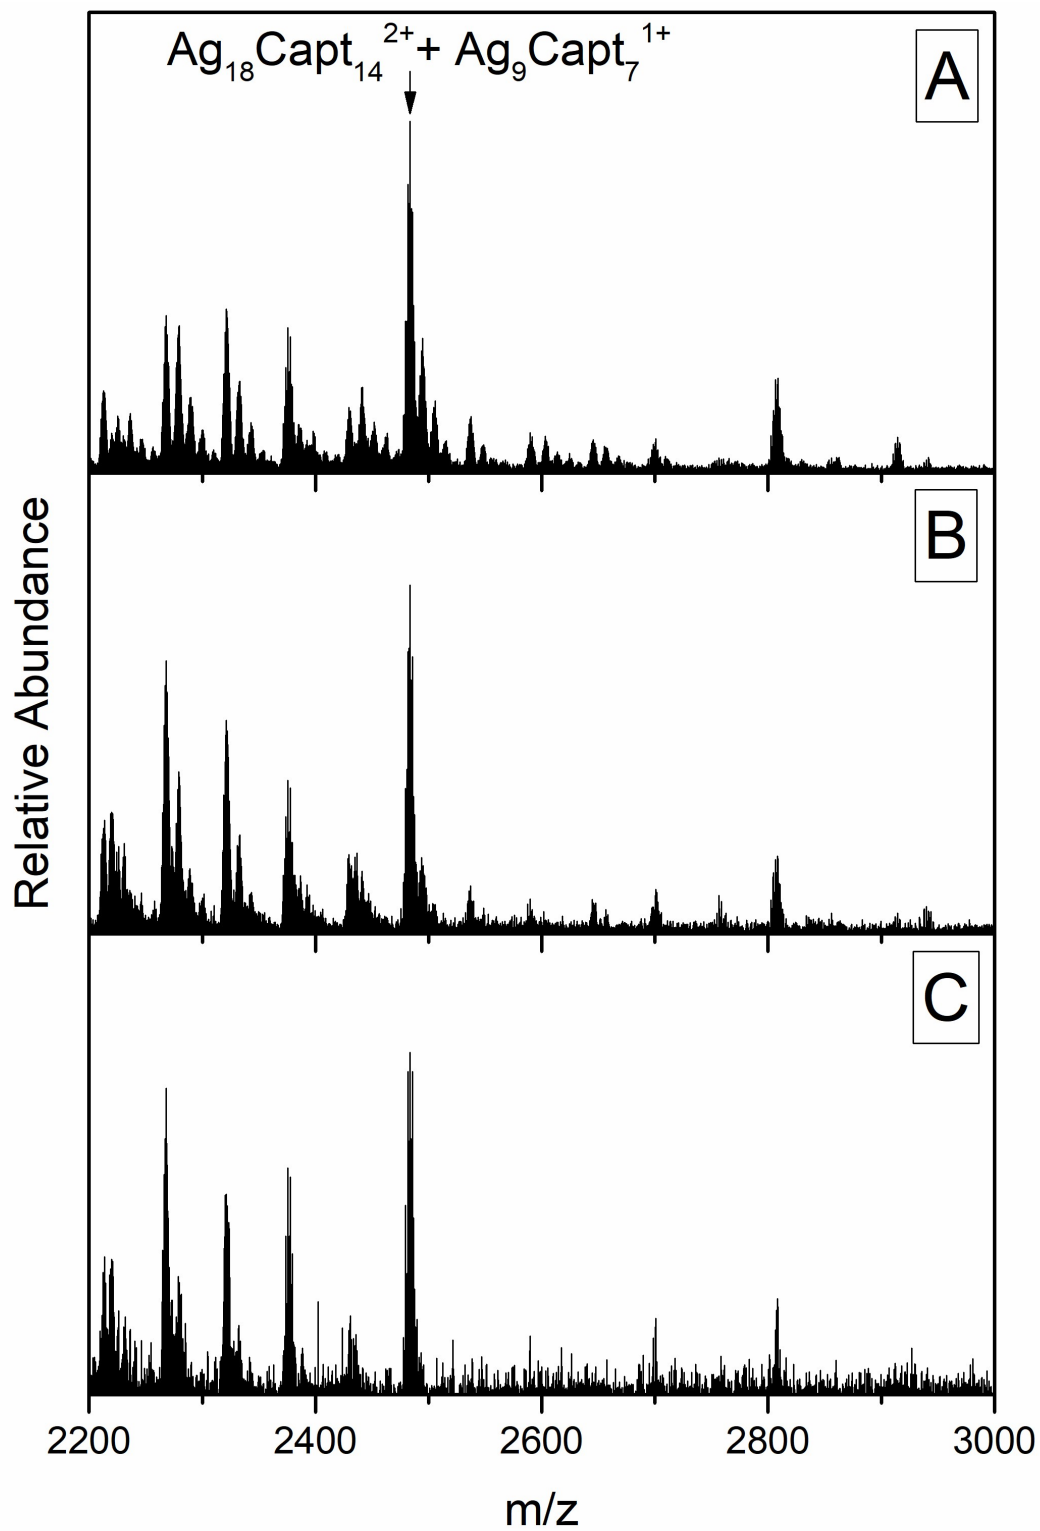

**Figure S9.** ESI-MS of silver clusters (AgNCs) performed under increasingly dilute conditions through dilution with water, from A (most concentrated) to C (least concentrated).

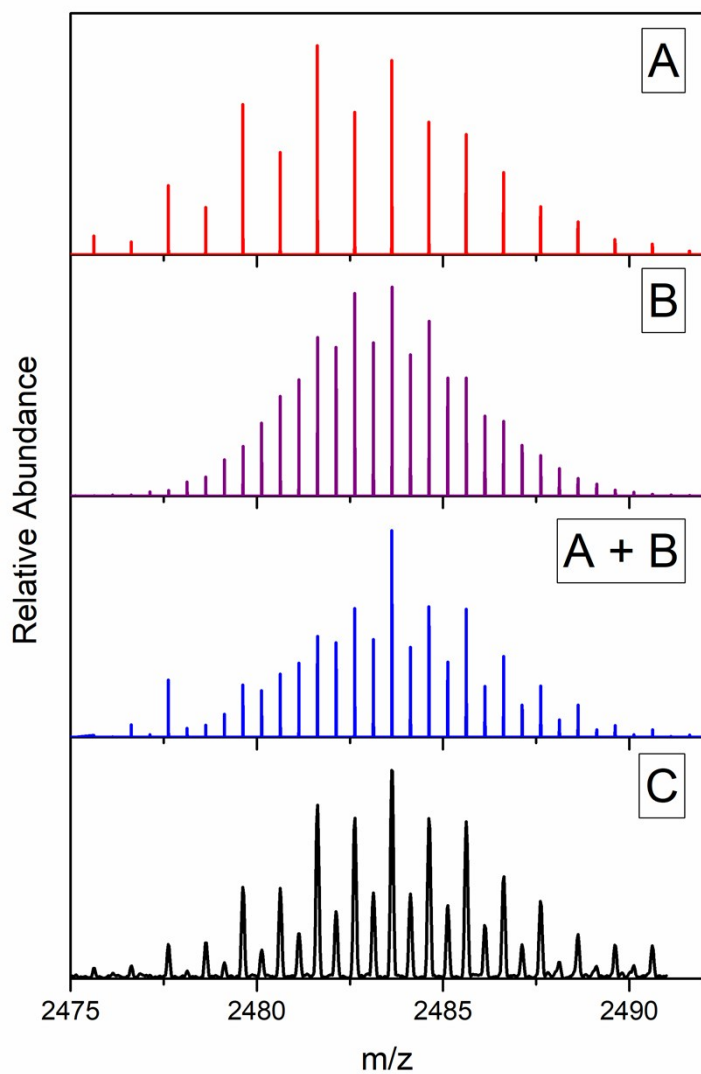

**Figure S10.** Simulated isotope patterns of A)  $\text{Ag}_9(\text{Capt})_7^{1+}$ , B)  $\text{Ag}_{18}(\text{Capt})_{14}^{2+}$ , A+B) the simulated isotope pattern of  $\text{Ag}_9(\text{Capt})_7^{1+}$  added to that of  $\text{Ag}_{18}(\text{Capt})_{14}^{2+}$ ; C) experimental data.

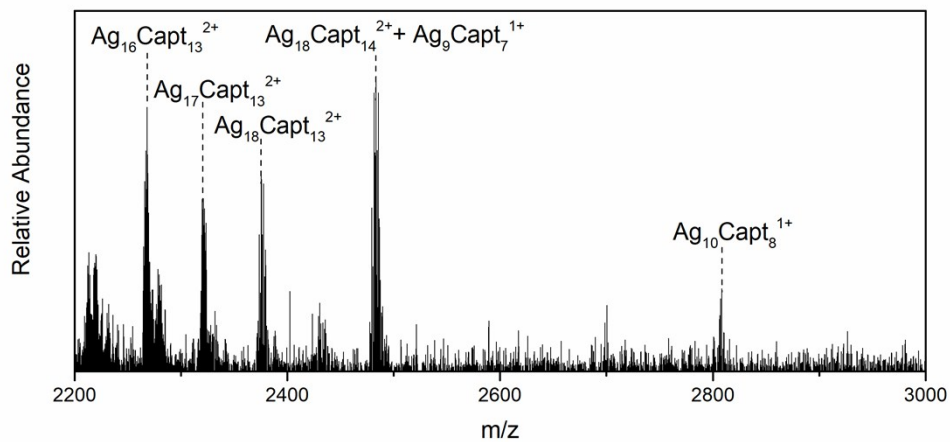

**Figure S11.** Isotopes observed and identified from 2200-3000 m/z in ESI-MS experiments.

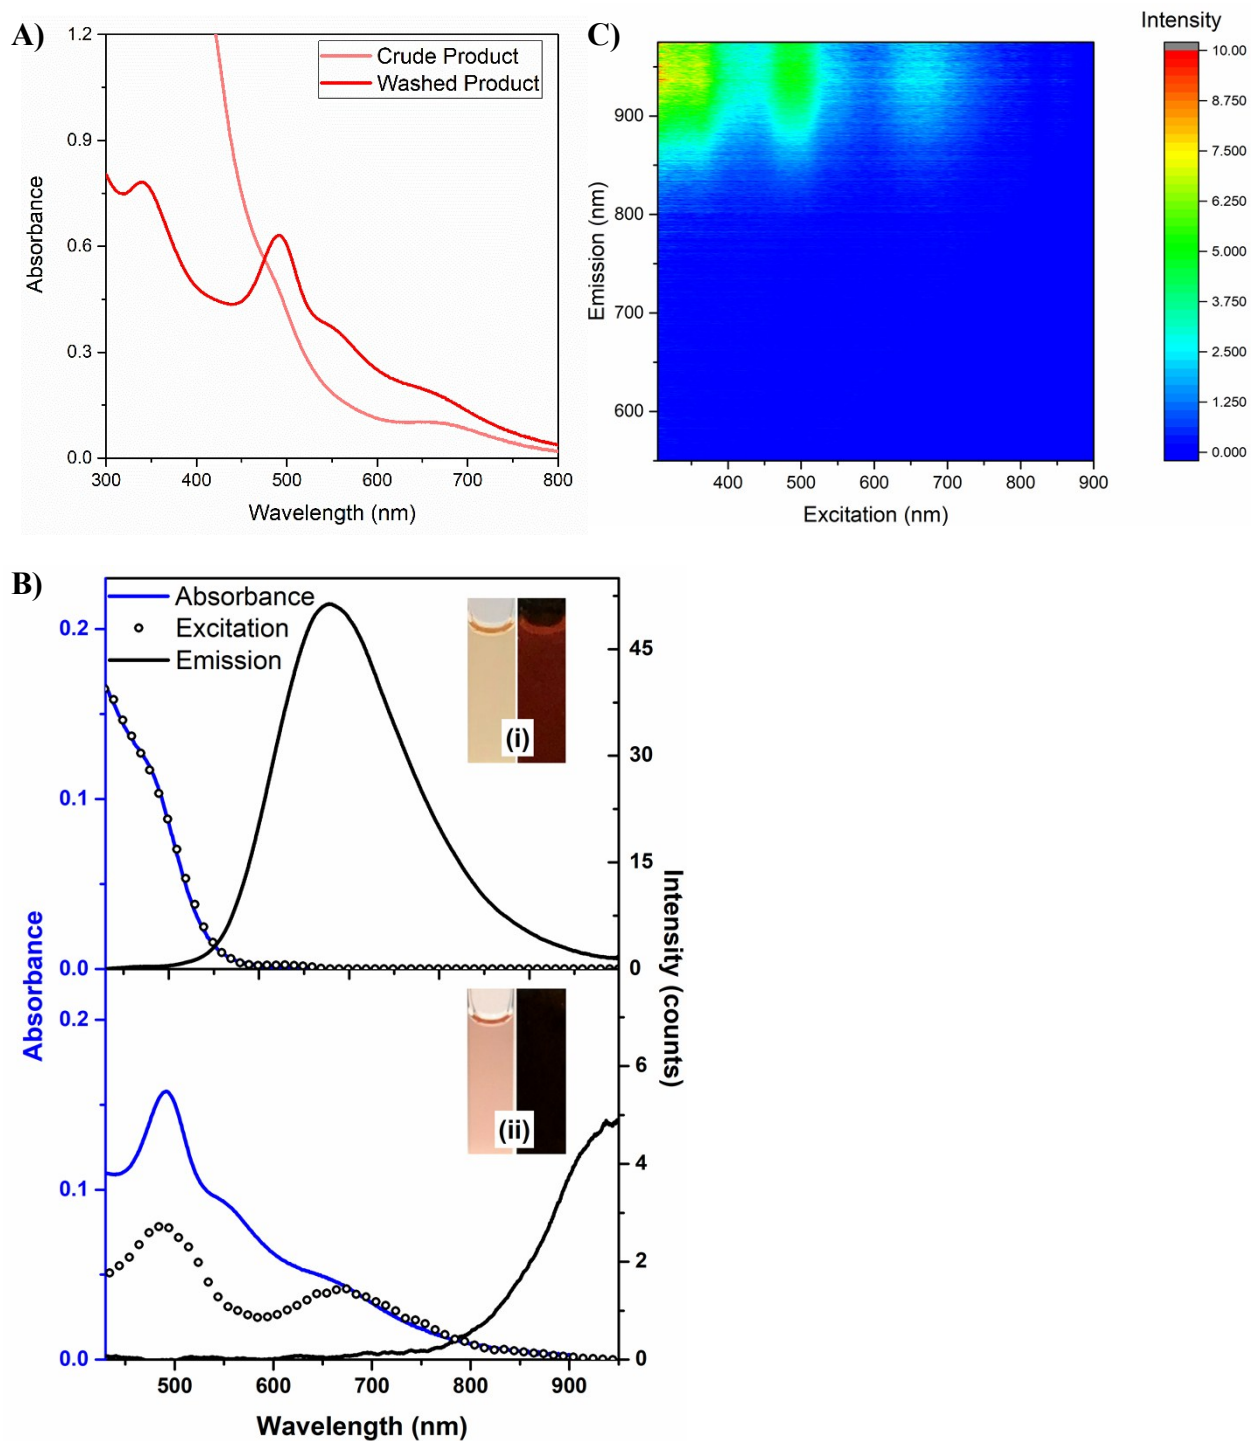

**Figure S12.** A) Absorbance spectra of thermally synthesized silver-captopril clusters directly after synthesis (crude product) and after washing and precipitating (washed product). B) TOP: Absorbance spectra of photochemical AgNC along with its emission spectra ( $\lambda_{\text{exc}} = 424$  nm) and excitation spectra ( $\lambda_{\text{ems}} = 680$  nm); inset (i): appearance of AgNC solution in (left) visible and (right) UVA light. BOTTOM: Absorbance spectra of thermal AgNC along with its emission spectra ( $\lambda_{\text{exc}} = 324$  nm) and excitation spectra ( $\lambda_{\text{ems}} = 925$  nm); inset (ii): appearance of AgNC solution in (left) visible and (right) UVA light. C) Fluorescence EEM scan of washed product.

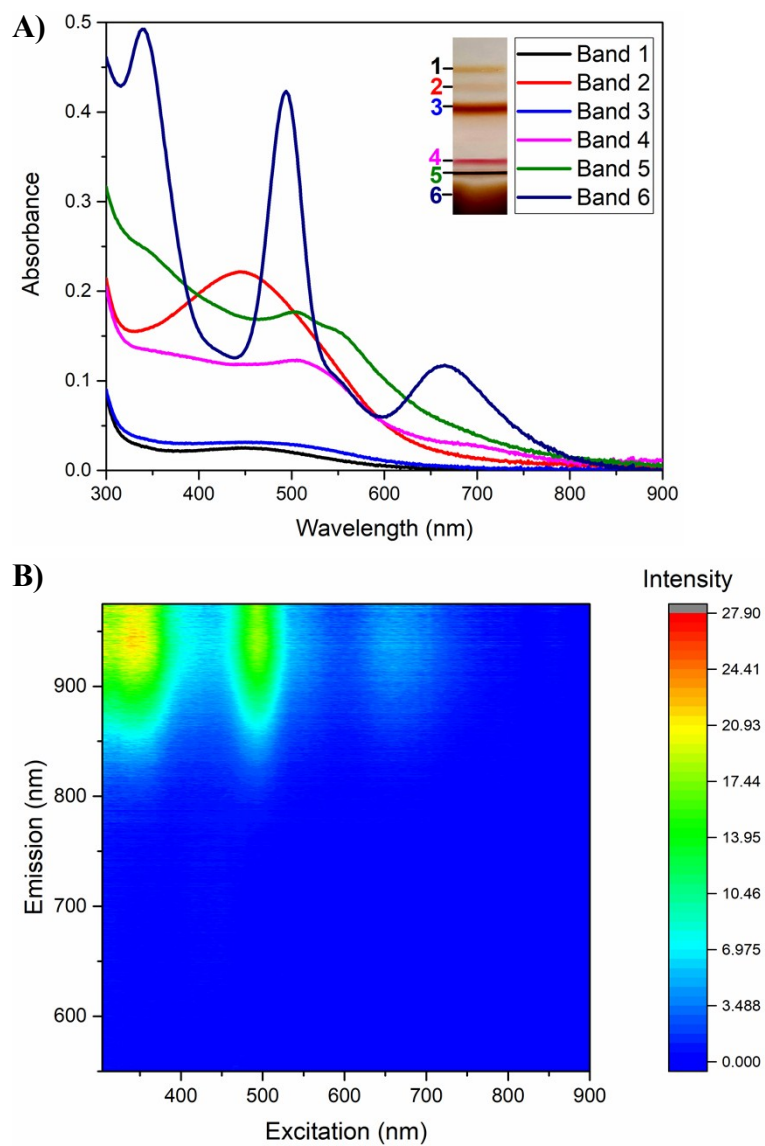

**Figure S13.** A) Absorbance spectra of thermally synthesized silver-captopril clusters after separation by SDS PAGE; inset: strip of SDS PAGE gel after separation with bands in gel numbered, B) fluorescence EEM scan of Band 6, the only emissive gel product.
